# Supplementary material for: Selective Internal Radiation Therapy Using Y-90 Resin Microspheres for Metastatic Colorectal Cancer: An Updated Systematic Review and Network Meta-Analysis
Source: Springer Nature journal article supplement (doi:10.1007/s12325-024-02800-5), 2024-02-26
Supplement: MOESM1 [file 26782652]

# Supplementary Materials

## **Selective Internal Radiation Therapy Using Y-90 Resin Microspheres for Metastatic Colorectal Cancer: An Updated Systematic Review and Network Meta-Analysis**

André Ferreira Azeredo-da-Silva,<sup>1</sup> Victor Hugo Fonseca de Jesus,<sup>2</sup> Ion Agirrezabal,<sup>3</sup> Victoria K Brennan,<sup>4</sup> Phuong Lien Carion,<sup>3</sup> Nathalie Amoury,<sup>3</sup> Bruna Muhlinberg Vetromilla,<sup>1</sup> Bruna Stella Zanotto,<sup>1</sup> Suki Shergill,<sup>4</sup> Patricia Klarmann Ziegelmann<sup>5,6</sup>

<sup>1</sup>HTAnalyze Consultoria e Treinamento Ltda., Porto Alegre, RS, Brazil; <sup>2</sup>Medical Oncology Department, Oncoclínicas Florianópolis, Florianópolis, Santa Catarina, Brazil; <sup>3</sup>Sirtex Medical Europe GmbH, Bonn, Germany; <sup>4</sup>Sirtex Medical United Kingdom Ltd., Hill House, London, United Kingdom; <sup>5</sup>Statistics Department, Universidade Federal do Rio Grande do Sul, Porto Alegre, Rio Grande do Sul, Brazil; <sup>6</sup>Postgraduate Program in Epidemiology, Universidade Federal do Rio Grande do Sul, Porto Alegre, Rio Grande do Sul, Brazil.

Corresponding Author:

André Ferreira Azeredo-da-Silva

Av. General Flores da Cunha, 1050, Sala 704, CEP 94910-001, bairro Vila Veranópolis, Cachoeirinha/RS – Brazil

+55-51-96057112

[andre@htanalyze.com](mailto:andre@htanalyze.com)

**Figure S1** Network graph for A) overall survival and B) progression-free survival

**A**

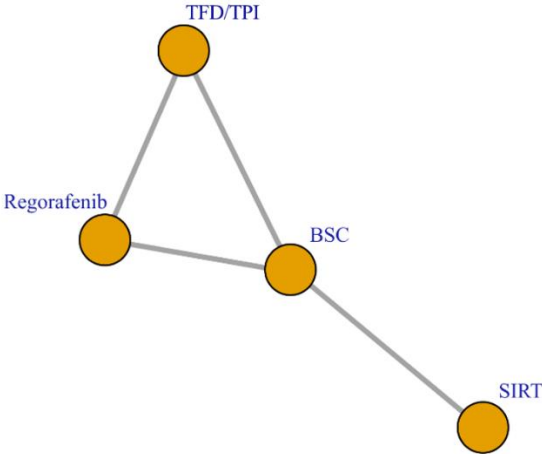

**B**

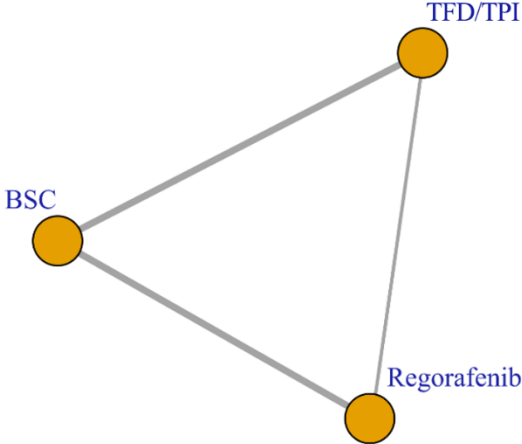

Nodes represent patients receiving each treatment, and edges (connecting lines) represent the comparison between the treatments.

**Table S1** Guidelines, recommendations, and reviews on the use of SIRT in mCRC by publication date

| Author/group/guidelines <sup>a</sup>                                                                                                                                                                                                                                                                                                                  | Year | Summary of guidelines                                                                                                                                                                                                                                                                                                                                                                                      |
|-------------------------------------------------------------------------------------------------------------------------------------------------------------------------------------------------------------------------------------------------------------------------------------------------------------------------------------------------------|------|------------------------------------------------------------------------------------------------------------------------------------------------------------------------------------------------------------------------------------------------------------------------------------------------------------------------------------------------------------------------------------------------------------|
| <b>NCCN; Colon Cancer Guidelines<sup>13</sup></b>                                                                                                                                                                                                                                                                                                     | 2023 | SIRT with Y-90 microspheres is "an option in highly selected patients with chemotherapy-resistant/refractory disease and with predominant liver metastases" and as preoperative portal vein embolization "when hepatic metastatic disease is not optimally resectable based on insufficient remnant liver volume".                                                                                         |
| <b>NCCN; Rectal Cancer Guidelines<sup>12</sup></b>                                                                                                                                                                                                                                                                                                    | 2023 | SIRT is "an option in highly selected patients with chemotherapy-resistant/refractory disease and with predominant liver metastases"                                                                                                                                                                                                                                                                       |
| <b>ESMO clinical practice guidelines on mCRC<sup>15</sup></b>                                                                                                                                                                                                                                                                                         | 2023 | The guideline identifies SIRT as an intraarterial treatment modality in treatment of colorectal metastases. The guideline states "TACE, TARE/SIRT and HAIC may be also considered as treatment options with non-curative intent [III, B]" "SIRT, HAIC and chemoembolization of CRLMs in earlier treatment lines may be interesting as 'consolidation treatment' but should be limited to clinical trials." |
| <b>ASCO; Guideline</b> (Morris VK, Kennedy EB, Baxter NN, et al. Treatment of Metastatic Colorectal Cancer: ASCO Guideline. J Clin Oncol. 2023;41:678-700.)                                                                                                                                                                                           | 2022 | SIRT is not routinely recommended. MDT management is required for patients with mCRC who are considered candidates for SIRT.                                                                                                                                                                                                                                                                               |
| <b>French guidelines, an intergroup consensus on clinical practice involving mCRC</b> (Phelip JM, Tougeron D, Léonard D, et al. Metastatic colorectal cancer (mCRC): French intergroup clinical practice guidelines for diagnosis, treatments and follow-up (SNFGE, FFCD, GERCOR, UNICANCER, SFCD, SFED, SFRO, SFR). Dig Liver Dis. 2019;51:1357-63.) | 2022 | Following first-line chemotherapy, guidelines recommend the use of SIR-Spheres Y-90 resin microspheres in the case of exclusive or predominant liver metastases ( $\leq 5$ extrahepatic liver lesions) with maintained liver function (bilirubin $\leq 2N$ ).                                                                                                                                              |
| <b>Manual de Oncologia Clínica do Brasil<sup>14</sup></b>                                                                                                                                                                                                                                                                                             | 2021 | The colon cancer recommendations were updated in 2021 and now recommend SIRT with Y-90 resin microspheres for patients with advanced stage unresectable disease (Stage IV) who are not suitable for surgery                                                                                                                                                                                                |
| <b>NICE; Guidelines 151: Colorectal Cancer (NG151)</b> (National Institute for Health and Care Excellence. Colorectal Cancer, 2020)                                                                                                                                                                                                                   | 2020 | For people who are intolerant or refractory to chemotherapy, SIRT should only be used with special arrangements for clinical governance, consent, and audit or research. In people who can receive                                                                                                                                                                                                         |

|                                                                                                                                                                                                                                                                                                                                                                                                                                                                                                                                                                                                |      |                                                                                                                                                                                                                                                                            |
|------------------------------------------------------------------------------------------------------------------------------------------------------------------------------------------------------------------------------------------------------------------------------------------------------------------------------------------------------------------------------------------------------------------------------------------------------------------------------------------------------------------------------------------------------------------------------------------------|------|----------------------------------------------------------------------------------------------------------------------------------------------------------------------------------------------------------------------------------------------------------------------------|
|                                                                                                                                                                                                                                                                                                                                                                                                                                                                                                                                                                                                |      | chemotherapy, SIRT should only be used in the context of clinical trials                                                                                                                                                                                                   |
| <b>NICE; Guidance on intervention procedures 672:</b><br><br><b>Selective internal radiotherapy for colorectal metastases unresectable cells in the liver [IPG672]</b> (National Institute for Health and Care Excellence, 2020)                                                                                                                                                                                                                                                                                                                                                               | 2020 | For people who are intolerant or refractory to chemotherapy, SIRT should only be used under special conditions for clinical governance, consent and audit, or research. In people who can receive chemotherapy, SIRT should only be used in the context of clinical trials |
| <b>Spanish consensus on liver metastases in CRC</b> (Vera R, González-Flores E, Rubio C, et al. Multidisciplinary management of liver metastases in patients with colorectal cancer: a consensus of SEOM, AEC, SEOR, SERVEI, and SEMNIM. Clin Transl Oncol. 2020;22:647-62.)                                                                                                                                                                                                                                                                                                                   | 2020 | There is clinical evidence that the use of SIRT is safe and well tolerated and is indicated in third-line dominant liver disease following chemotherapy or in combination with chemotherapy.                                                                               |
| <b>German GGPO</b><br><br><b>S3 Guidelines</b> (German Guideline Program in Oncology (GGPO). Evidenced-based Guideline for Colorectal Cancer. Version 2.1. 2019.)                                                                                                                                                                                                                                                                                                                                                                                                                              | 2019 | SIRT with Y-90 resin microspheres can be used for disseminated liver metastases of CRC for patients where no other equal therapy is available.                                                                                                                             |
| <b>NSH. Clinical commissioning policy for SIRT (NHS)</b> (NHS. Clinical commissioning policy for Selective internal radiation therapy for chemotherapy refractory intolerant metastatic colorectal cancer (2018). <a href="https://www.england.nhs.uk/wp-content/uploads/2018/12/Selective-internal-radiation-therapy-for-chemotherapy-refractory-intolerant-metastatic-colorectal-cancer.pdf">https://www.england.nhs.uk/wp-content/uploads/2018/12/Selective-internal-radiation-therapy-for-chemotherapy-refractory-intolerant-metastatic-colorectal-cancer.pdf</a> . Accessed 16 May 2023.) | 2018 | NHS England recommended the use of SIRT for patients with liver-limited, chemotherapy-refractory/intolerant metastatic colorectal cancer who met the inclusion criteria                                                                                                    |
| <b>Expert consensus statements and expert opinion</b>                                                                                                                                                                                                                                                                                                                                                                                                                                                                                                                                          |      |                                                                                                                                                                                                                                                                            |
| <b>US-based expert consensus on the role of yttrium-90 SIRT in liver-dominant mCRC<sup>43</sup></b>                                                                                                                                                                                                                                                                                                                                                                                                                                                                                            | 2020 | SIRT with Y-90 has the potential to play a major role in all phases of liver mCRC treatment, eg; in chemotherapy refractory or-intolerant patients, in patients who need a chemotherapy holiday, as a                                                                      |

|                                                                                                                                                                                                                                                                                                          |      |                                                                                                                                                                                                                                                                                                                                                                                     |
|----------------------------------------------------------------------------------------------------------------------------------------------------------------------------------------------------------------------------------------------------------------------------------------------------------|------|-------------------------------------------------------------------------------------------------------------------------------------------------------------------------------------------------------------------------------------------------------------------------------------------------------------------------------------------------------------------------------------|
|                                                                                                                                                                                                                                                                                                          |      | consolidation therapy as an adjunct to second-line or later, to facilitate downsizing.                                                                                                                                                                                                                                                                                              |
| <b>Expert opinion</b> (Bekaii-Saab T, Kim R, Kim TW, et al. Third- or later-line therapy for metastatic colorectal cancer: reviewing best practice. Clin Colorectal Cancer.2019;18:e117-29.)                                                                                                             | 2019 | SIRT should be considered as an option in first line treatment for patients with liver-limited or -dominant metastatic disease                                                                                                                                                                                                                                                      |
| <b>Wang et al. expert opinion</b> (Wang DS, Louie JD, Sze DY. Evidence-based integration of yttrium-90 radioembolization in the contemporary management of hepatic metastases from colorectal cancer. Tech Vasc Interv Radiol. 2019;22:74-80.)                                                           | 2019 | In patients who have failed two or more lines of systemic chemotherapy, the authors found that SIRT with Y-90 resin microspheres "confers a significant survival benefit with low toxicity...", and point out that it is endorsed by the NCCN and ESMO in this setting. Y-90 resin microspheres have been recommended for use in patients-refractory or -intolerant to chemotherapy |
| <b>Recommendations from a panel of Spanish experts on the use of SIRT in CRC in liver metastasis</b> (Aranda E, Aparicio J, Bilbao JI, et al. Recommendations for SIR-Spheres Y-90 resin microspheres in chemotherapy-refractory/intolerant colorectal liver metastases. Future Oncol. 2017;13:2065-82.) | 2017 | The expert panel recommends the use of SIR Spheres Y-90<br><br>resin microspheres in chemotherapy-refractory<br><br>and chemotherapy-intolerant patients                                                                                                                                                                                                                            |

<sup>a</sup> Reference numbers according to the main article. References not cited in the main article are provided in full in parenthesis.  
ASCO, American Society of Clinical Oncology; ESMO, European Society for Medical Oncology; mCRC, colorectal cancer metastatic; MOC, "Manual de Oncología Clínica"; NCCN, National Comprehensive Cancer Network; NG, NICE guideline; NHS, National Health Service; NICE, National Institute for Health and Care Excellence; SIRT, selective internal radiotherapy.

**Table S2** Search terms

| Database                                  | ID | Search strategy                                                                                                                                                                                                                                                                                                                                                                                                                                                                                                                                                                                                                                                                                                                                                                                                                                                                                                       | Hits           |
|-------------------------------------------|----|-----------------------------------------------------------------------------------------------------------------------------------------------------------------------------------------------------------------------------------------------------------------------------------------------------------------------------------------------------------------------------------------------------------------------------------------------------------------------------------------------------------------------------------------------------------------------------------------------------------------------------------------------------------------------------------------------------------------------------------------------------------------------------------------------------------------------------------------------------------------------------------------------------------------------|----------------|
| MEDLINE and<br>EMBASE (through<br>EMBASE) | #1 | ('colorectal cancer'/exp OR 'colorectal cancer') AND<br>([embase]/lim OR [medline]/lim)                                                                                                                                                                                                                                                                                                                                                                                                                                                                                                                                                                                                                                                                                                                                                                                                                               | 400,691        |
|                                           | #2 | ('colorectal cancer':ab,ti OR 'colorectal carcinoma':ab,ti) AND<br>([embase]/lim OR [medline]/lim)                                                                                                                                                                                                                                                                                                                                                                                                                                                                                                                                                                                                                                                                                                                                                                                                                    | 194,797        |
|                                           | #3 | (#1 OR #2) AND ([embase]/lim OR [medline]/lim)                                                                                                                                                                                                                                                                                                                                                                                                                                                                                                                                                                                                                                                                                                                                                                                                                                                                        | 403,715        |
|                                           | #4 | ('tipiracil plus trifluridine'/exp OR 'regorafenib'/exp OR<br>'brachytherapy device'/exp) AND ([embase]/lim OR<br>[medline]/lim)                                                                                                                                                                                                                                                                                                                                                                                                                                                                                                                                                                                                                                                                                                                                                                                      | 9,331          |
|                                           | #5 | ('lonsurf':ab,ti OR 'tas 102':ab,ti OR 2022 'tas102':ab,ti OR<br>'tipiracil hydrochloride plus trifluridine':ab,ti OR 'trifluridine plus<br>tipiracil':ab,ti OR 'trifluridine plus tipiracil hydrochloride':ab,ti OR<br>'regorafenib':ab,ti OR bay 73 4506':ab,ti OR 'bay 73-4506':ab,ti<br>OR 'bay 734506':ab,ti OR 'bay73 4506':ab,ti OR 'bay73-<br>4506':ab,ti OR 'bay734506':ab,ti OR 'resihance':ab,ti OR<br>'stivarga':ab,ti OR 'sir-sphere':ab,ti OR 'sir-spheres':ab,ti OR<br>'sirshere':ab,ti OR 'sirsphere':ab,ti OR ('yttrium-90':ab,ti AND<br>'resin microspheres':ab,ti)) AND ([embase]/lim OR<br>[medline]/lim)                                                                                                                                                                                                                                                                                         | 4,506          |
|                                           | #6 | (#4 OR #5) AND ([embase]/lim OR [medline]/lim)                                                                                                                                                                                                                                                                                                                                                                                                                                                                                                                                                                                                                                                                                                                                                                                                                                                                        | 4,301          |
|                                           | #7 | ('clinical trial'/exp OR 'randomization'/de OR 'controlled<br>study'/de OR 'comparative study'/de OR 'single blind<br>procedure'/de OR 'double blind procedure'/de OR 'crossover<br>procedure'/de OR 'placebo'/de OR 'clinical trial' OR 'clinical<br>trials' OR 'controlled clinical trial' OR 'controlled clinical trials'<br>OR 'randomised controlled trial' OR 'randomized controlled trial'<br>OR 'randomised controlled trials' OR 'randomized controlled<br>trials' OR 'randomisation' OR 'randomization' OR rct OR<br>'random allocation' OR 'randomly allocated' OR 'allocated<br>randomly' OR placebo* OR 'prospective study'/de OR<br>(allocated NEAR/2 random) OR (random* NEAR/1 assign*) OR<br>random* OR ((single OR double OR triple OR treble) NEAR/1<br>(blind* OR mask*)) NOT ('case study'/de OR 'case report' OR<br>'abstract report'/de OR 'letter'/de) AND ([embase]/lim OR<br>[medline]/lim) | 11,822,6<br>16 |
|                                           | #8 | ('cohort analysis'/exp OR 'longitudinal study'/exp OR<br>'prospective study'/exp OR 'follow up'/exp OR 'case control<br>study'/exp OR ((case* NEXT/1 control*):ti,ab) OR cohort*:ab,ti<br>OR (((follow up' OR followup) NEXT/1 (study OR                                                                                                                                                                                                                                                                                                                                                                                                                                                                                                                                                                                                                                                                              | 4,646,24<br>2  |

|                             |                                                                                    |                                                                                                                                                                                                                                                                                                  |            |
|-----------------------------|------------------------------------------------------------------------------------|--------------------------------------------------------------------------------------------------------------------------------------------------------------------------------------------------------------------------------------------------------------------------------------------------|------------|
|                             | studies)):ab,ti) OR 'retrospective study'/exp) AND ([embase]/lim OR [medline]/lim) |                                                                                                                                                                                                                                                                                                  |            |
| #9                          | (#7 OR #8) AND ([embase]/lim OR [medline]/lim)                                     | 13,932,337                                                                                                                                                                                                                                                                                       |            |
| #10                         | #3 AND #6 AND #9 AND ([embase]/lim OR [medline]/lim)                               | 2,668                                                                                                                                                                                                                                                                                            |            |
| #11                         | #10 AND (2018:py OR 2019:py OR 2020:py OR 2021:py OR 2022:py)                      | <b>1,410</b>                                                                                                                                                                                                                                                                                     |            |
| <b>The Cochrane Library</b> | #1                                                                                 | MeSH descriptor: [Colorectal Neoplasms] explode all trees                                                                                                                                                                                                                                        | 9,373      |
|                             | #2                                                                                 | "colorectal cancer" OR "colorectal carcinoma" OR "colorectal neoplasm"                                                                                                                                                                                                                           | 15,722     |
|                             | #3                                                                                 | #1 OR #2                                                                                                                                                                                                                                                                                         | 19,652     |
|                             | #4                                                                                 | "lonsurf" OR "tas 102" OR "tas102" OR "tipiracil hydrochlorid plus trifluridine" OR "trifluridine plus tipiracil" OR "trifluridine plus tipiracil hydrochloride" OR "regorafenib" OR "bay 73 4506" OR "bay 73-4506" OR "bay 734506" OR "stivarga" OR "SIR-Sphere" OR "SIR-Spheres" OR "SIRShere" | 816        |
|                             | #5                                                                                 | #3 and #4 with Publication Year from 2018 to 2022, in Trials                                                                                                                                                                                                                                     | <b>179</b> |
| <b>Total</b>                |                                                                                    | <b>1,589</b>                                                                                                                                                                                                                                                                                     |            |

**Table S3** Risk of bias for randomized controlled trials using the RoB 2.0 for overall survival

| Study <sup>a</sup>            | Domain 1 | Domain 2 | Domain 3 | Domain 4 | Domain 5 | Overall |
|-------------------------------|----------|----------|----------|----------|----------|---------|
| Hendlisz et al. <sup>33</sup> | !        | +        | +        | +        | !        | +       |
| Yoshino et al. <sup>38</sup>  | +        | +        | !        | +        | !        | +       |
| Grothey et al. <sup>35</sup>  | +        | +        | +        | +        | +        | +       |
| Li et al. <sup>36</sup>       | +        | +        | +        | +        | +        | +       |
| Mayer et al. <sup>37</sup>    | +        | +        | +        | +        | +        | +       |
| Sanoff et al. <sup>4</sup>    | +        | +        | +        | +        | +        | +       |
| Xu et al. <sup>30</sup>       | !        | +        | +        | +        | +        | +       |
| Xu et al. <sup>31</sup>       | !        | !        | +        | +        | +        | +       |

<sup>a</sup> Reference numbers according to the main article.

Domain 1: Randomization process; Domain 2: Deviations from the intended interventions; Domain 3: Missing outcome data; Domain 4: Measurement of the outcome; Domain 5: Selection of the reported result. Green circle: Low risk of bias. Yellow circle: Some concerns.



**Table S4** Risk of bias for randomized controlled trials using the RoB 2.0 for progression-free survival

| Study <sup>a</sup>           | Domain 1                                                                          | Domain 2                                                                          | Domain 3                                                                          | Domain 4                                                                          | Domain 5                                                                            | Overall                                                                             |
|------------------------------|-----------------------------------------------------------------------------------|-----------------------------------------------------------------------------------|-----------------------------------------------------------------------------------|-----------------------------------------------------------------------------------|-------------------------------------------------------------------------------------|-------------------------------------------------------------------------------------|
| Yoshino et al. <sup>38</sup> |  |  |  |  |  |  |
| Grothey et al. <sup>35</sup> |  |  |  |  |  |  |
| Li et al. <sup>36</sup>      |  |  |  |  |  |  |
| Mayer et al. <sup>37</sup>   |  |  |  |  |  |  |
| Sanoff et al. <sup>4</sup>   |  |  |  |  |  |  |
| Xu et al. <sup>30</sup>      |  |  |  |  |  |  |
| Xu et al. <sup>31</sup>      |  |  |  |  |  |  |

<sup>a</sup> Reference numbers according to the main article.

Domain 1: Randomization process; Domain 2: Deviations from the intended interventions; Domain 3: Missing outcome data; Domain 4: Measurement of the outcome; Domain 5: Selection of the reported result.

**Table S5** Risk of bias for non-randomized trials using the ROBINS-I tool

| <b>Study<sup>a</sup></b>           | <b>Domain 1</b> | <b>Domain 2</b> | <b>Domain 3</b> | <b>Domain 4</b> | <b>Domain 5</b> | <b>Domain 6</b> | <b>Domain 7</b> | <b>Overall</b> |
|------------------------------------|-----------------|-----------------|-----------------|-----------------|-----------------|-----------------|-----------------|----------------|
| Bester et al. <sup>34</sup>        | Critical        | Serious         | Low             | Low             | Low             | Serious         | Moderate        | Critical       |
| Seidensticker et al. <sup>32</sup> | Serious         | Serious         | Low             | Low             | Moderate        | Serious         | Moderate        | Serious        |
| Moriwaki et al. <sup>26</sup>      | Moderate        | Serious         | Low             | Low             | Moderate        | Serious         | Moderate        | Serious        |
| Nakashima et al. <sup>27</sup>     | Serious         | Serious         | Low             | Low             | Moderate        | Serious         | Moderate        | Serious        |
| Patel et al. <sup>28</sup>         | Serious         | Serious         | Low             | Low             | Moderate        | Serious         | Moderate        | Serious        |
| Vitale et al. <sup>29</sup>        | Critical        | Serious         | Low             | Low             | Moderate        | Serious         | Moderate        | Critical       |
| Hsieh et al. <sup>25</sup>         | Serious         | Serious         | Low             | Low             | Moderate        | Serious         | Moderate        | Serious        |

<sup>a</sup> Reference numbers according to the main article.

Domain 1: Bias due to confounding; Domain 2: Bias in selection of participants into the study; Domain 3: Bias in classification of interventions; Domain 4: Bias due to deviations from intended interventions; Domain 5: Bias due to missing data; Domain 6: Bias in measurement of outcomes; Domain 7: Bias in selection of the reported result.

**Table S6** Assessment of the certainty of the evidence (GRADE) for the pairwise comparison between SIRT and BSC for mCRC

| <b>SIRT compared to BSC for mCRC</b> |                                                        |                                              |                                             |
|--------------------------------------|--------------------------------------------------------|----------------------------------------------|---------------------------------------------|
| <b>Outcomes</b>                      | <b>No. of participants<br/>(studies)<br/>Follow-up</b> | <b>Certainty of<br/>evidence<br/>(GRADE)</b> | <b>Relative<br/>effect<br/>(95% CI)</b>     |
| Overall survival                     | 44<br>(1 RCT)                                          | ⊕⊕⊕○<br>Moderate <sup>a</sup>                | <b>HR 0.48<br/>(0.27, 0.87)<sup>c</sup></b> |
|                                      | 311<br>(2 observational<br>studies)                    | ⊕⊕⊕○<br>Moderate <sup>b</sup>                |                                             |

<sup>a</sup> Single study with a small sample size. <sup>b</sup> Some issues regarding patient selection and no mention of adjustments for confounders. Even though blindness is not mandatory for some outcomes, patients and investigators knew the intervention and it brings some level of bias. <sup>c</sup> The findings from the RCT and the observational studies were grouped for the statistical analysis.  
BSC, best supportive care; HR, hazard ratio; mCRC, metastatic colorectal cancer; RCT, randomized controlled trial.

**Table S7** Assessment of the certainty of the evidence (GRADE) for the pairwise comparison between TFD/TPI and Regorafenib for mCRC

| <b>TFD/TPI compared to Regorafenib for mCRC</b> |                                              |                                          |                                       |
|-------------------------------------------------|----------------------------------------------|------------------------------------------|---------------------------------------|
| <b>Outcomes</b>                                 | <b>№ of participants (studies) Follow-up</b> | <b>Certainty of the evidence (GRADE)</b> | <b>Relative effect (95% CI)</b>       |
| Overall survival                                | 6,040<br>(3 observational studies)           | ⊕⊕⊕○<br>Moderate <sup>a</sup>            | <b>HR 0.79</b><br><b>(0.6, 1.06)</b>  |
| Progression-free survival                       | 550<br>(1 observational study)               | ⊕⊕○○<br>Low <sup>a,b</sup>               | <b>HR 0.97</b><br><b>(0.65, 1.44)</b> |

<sup>a</sup> Some issues regarding patient selection and no mention of adjustments for confounders. Even though blindness is not mandatory for some outcomes, patients and investigators knew the intervention and it brings some level of bias. <sup>b</sup> Single study.  
HR, hazard ratio; mCRC, metastatic colorectal cancer; TFD/TPI, trifluridine–tipiracil.

**Table S8** Assessment of the certainty of the evidence (GRADE) for the pairwise comparison between TFD/TPI and BSC for mCRC

| <b>TFD/TPI compared to BSC for mCRC</b> |                                              |                                          |                                       |
|-----------------------------------------|----------------------------------------------|------------------------------------------|---------------------------------------|
| <b>Outcomes</b>                         | <b>№ of participants (studies) Follow-up</b> | <b>Certainty of the evidence (GRADE)</b> | <b>Relative effect (95% CI)</b>       |
| Overall survival                        | 1,375<br>(3 RCTs)                            | ⊕⊕⊕⊕<br>High                             | <b>HR 0.62</b><br><b>(0.46, 0.83)</b> |
| Progression-free survival               | 1375<br>(3 RCTs)                             | ⊕⊕⊕⊕<br>High                             | <b>HR 0.44</b><br><b>(0.31, 0.62)</b> |

BSC, best supportive care; HR, hazard ratio; mCRC, metastatic colorectal cancer; RCT, randomized controlled trial; TFD/TPI, trifluridine–tipiracil.

**Table S9** Assessment of the certainty of the evidence (GRADE) for the pairwise comparison between Regorafenib and BSC for mCRC

| <b>Regorafenib compared to BSC for mCRC</b> |                                                       |                                                  |                                         |
|---------------------------------------------|-------------------------------------------------------|--------------------------------------------------|-----------------------------------------|
| <b>Outcomes</b>                             | <b>Nº of participants<br/>(studies)<br/>Follow-up</b> | <b>Certainty of the<br/>evidence<br/>(GRADE)</b> | <b>Relative<br/>effect<br/>(95% CI)</b> |
| Overall survival                            | 1,317<br>(4 RCTs)                                     | ⊕⊕⊕⊕<br>High                                     | <b>HR 0.78</b><br><b>(0.57, 1.05)</b>   |
| Progression-free survival                   | 1,317<br>(4 RCTs)                                     | ⊕⊕⊕⊕<br>High                                     | <b>HR 0.46</b><br><b>(0.33, 0.63)</b>   |

BSC, best supportive care; HR, hazard ratio; mCRC, metastatic colorectal cancer; RCT, randomized controlled trial.

**Table S10** Demographic and clinical characteristics of study samples

|                            | No. patients | Median age (years) | Male (%) | ECOG PS 0 (%) | ECOG PS 1 (%) | ECOG PS 2 (%) | KRAS mutation (%) | EHD (%) | Multiple metastatic organs (%) |
|----------------------------|--------------|--------------------|----------|---------------|---------------|---------------|-------------------|---------|--------------------------------|
| <b>TFD/TPI vs. REG</b>     |              |                    |          |               |               |               |                   |         |                                |
| Moriwaki et al [26]        |              |                    |          |               |               |               | 49 <sup>f</sup>   |         |                                |
| TFD/TPI                    | 327          | 64                 | 60       | 39            | 54            | 7             |                   | NR      | 77                             |
| REG                        | 223          | 64                 | 57       | 43            | 54            | 3             | 49 <sup>f</sup>   | NR      | 73                             |
| Nakashima et al [27]       |              |                    |          |               |               |               |                   |         |                                |
| TFD/TPI                    | 3,777        | 68                 | 60       | NR            | NR            | NR            | NR                | NR      | 28                             |
| REG                        | 1,501        | 66                 | 62       | NR            | NR            | NR            | NR                | NR      | 30                             |
| Patel et al [28]           |              |                    |          |               |               |               |                   |         |                                |
| TFD/TPI                    | 126          | 55                 | 45.2     | 27.0          | 46.8          | 4.0           | 53.3              | NR      | NR                             |
| REG                        | 95           | 57                 | 54.7     | 25.3          | 32.6          | 3.2           | 52.5              | NR      | NR                             |
| Vitale et al [29]          |              |                    |          |               |               |               | 48 <sup>f</sup>   |         |                                |
| TFD/TPI                    | 76           | NR                 | NR       | 50            | 49            | 1             |                   | NR      | NR                             |
| REG                        | 64           | NR                 | NR       | 45            | 50            | 5             | 62 <sup>f</sup>   | NR      | NR                             |
| Hsieh et al [25]           |              |                    |          |               |               |               | 64 <sup>f</sup>   |         |                                |
| TFD/TPI                    | 50           | 64                 | 52       | NR            | NR            | NR            |                   | NR      | NR                             |
| REG                        | 75           | 64                 | 59       | NR            | NR            | NR            | 60 <sup>f</sup>   | NR      | NR                             |
| <b>TFD/TPI vs. placebo</b> |              |                    |          |               |               |               |                   |         |                                |
| Yoshino et al [38]         |              |                    |          |               |               |               |                   |         |                                |
| TFD/TPI                    | 112          | 63                 | 57       | 64            | 33            | 3             | 45                | NR      | 78                             |
| Placebo                    | 57           | 62                 | 49       | 61            | 37            | 2             | 52                | NR      | 81                             |
| Mayer et al [37]           |              |                    |          |               |               |               |                   |         |                                |
| TFD/TPI                    | 534          | 63                 | 61       | 56            | 44            | NR            | 51                | NR      | NR                             |
| Placebo                    | 266          | 63                 | 62       | 55            | 45            | NR            | 51                | NR      | NR                             |
| Xu et al [31]              | 271          | 58                 | 63       | 24            | 76            | NR            | 37                | NR      | 39 <sup>c</sup>                |
| TFD/TPI                    |              |                    |          |               |               |               |                   |         |                                |

|                          |                 |                 |                 |    |    |                 |                 |                 |                 |  |
|--------------------------|-----------------|-----------------|-----------------|----|----|-----------------|-----------------|-----------------|-----------------|--|
| Placebo                  | 135             | 56              | 62              | 22 | 78 | NR              | 37              | NR              | 39 <sup>c</sup> |  |
| <b>REG vs. placebo</b>   |                 |                 |                 |    |    |                 |                 |                 |                 |  |
| Grothey et al [35]       |                 |                 |                 |    |    |                 |                 |                 |                 |  |
| REG                      | 505             | 61              | 62              | 52 | 48 | NR              | 54              | NR              | NR              |  |
| Placebo                  | 255             | 61              | 60              | 57 | 43 | NR              | 62              | NR              | NR              |  |
| Li et al [36]            |                 |                 |                 |    |    |                 |                 |                 |                 |  |
| REG                      | 136             | 58              | 63              | 26 | 74 | NR              | 34              | NR              | 79              |  |
| Placebo                  | 68              | 56              | 49              | 22 | 78 | NR              | 26              | NR              | 78              |  |
| Sanoff et al [4]         |                 |                 |                 |    |    |                 |                 |                 |                 |  |
| REG                      | 120             | 62              | 57              | 43 | 57 | NR              | 45 <sup>f</sup> | NR              | NR              |  |
| Placebo                  | 61              | 62              | 52              | 38 | 62 | NR              | 61 <sup>f</sup> | NR              | NR              |  |
| Xu et al [31]            |                 |                 |                 |    |    |                 |                 |                 |                 |  |
| REG                      | 112             | 58              | 66              | 28 | 72 | NR              | 35              | NR              | 83              |  |
| Placebo                  | 60              | 55              | 45              | 22 | 78 | NR              | 27              | NR              | 78              |  |
| <b>SIRT vs. BSC</b>      |                 |                 |                 |    |    |                 |                 |                 |                 |  |
| Hendlisz et al [33]      |                 |                 |                 |    |    |                 |                 |                 |                 |  |
| SIRT                     | 21              | 62              | 48              | 71 | 24 | 5               | NR              | 0 <sup>e</sup>  | 0 <sup>e</sup>  |  |
| BSC                      | 23              | 62              | 78              | 74 | 22 | 4               | NR              | 0 <sup>e</sup>  | 0 <sup>e</sup>  |  |
| Bester et al [34]        |                 |                 |                 |    |    |                 |                 |                 |                 |  |
| SIRT                     | 224             | 67 <sup>a</sup> | 63              | 85 | NR | NR              | NR              | 38              | NR              |  |
| BSC                      | 51 <sup>b</sup> | 66 <sup>b</sup> | 69 <sup>b</sup> | NR | NR | NR              | NR              | 33 <sup>b</sup> | NR              |  |
| Seidensticker et al [32] |                 |                 |                 |    |    |                 |                 |                 |                 |  |
| SIRT                     | 29              | 62 <sup>a</sup> | 76              | NR | NR | 80 <sup>d</sup> | NR              | 48.3            | NR              |  |
| BSC                      | 29              | 61 <sup>a</sup> | 79              | NR | NR | 80 <sup>d</sup> | NR              | 48.3            | NR              |  |

<sup>a</sup> Mean age; <sup>b</sup> Also included patients with other primary tumours; <sup>c</sup> ≥3 metastatic sites; <sup>d</sup> Karnofsky index, not ECOG OS; <sup>e</sup> Extrahepatic disease listed as exclusion criteria; <sup>f</sup> RAS mutation, not KRAS.

BSC, best supportive care; ECOG PS, Eastern Cooperative Oncology Group performance status; EHD, extrahepatic disease aside from the primary site; KRAS, Kirsten rat sarcoma; NR, not reported; REG, regorafenib; SIRT, selective internal radiation therapy; TFD/TPI, trifluridine–tipiracil.

**Table S11** Summary of prior systemic therapies

| TFD/TPI vs REG            | Prior chemotherapy regimens (%) |     |     |      |      |     |      |     |      |    |       | %   |       |           |     |
|---------------------------|---------------------------------|-----|-----|------|------|-----|------|-----|------|----|-------|-----|-------|-----------|-----|
|                           | Any                             | 1   | 1-2 | 2    | 3    | ≥ 3 | 4    | ≥ 4 | 5    | 6  | Irino | Oxa | Bevac | Cetuximab | REG |
| Moriwaki et al [26]       |                                 |     |     |      |      |     |      |     |      |    |       |     |       |           |     |
| TFD/TPI                   | NR                              | NR  | NR  | NR   | NR   | 50  | NR   | NR  | NR   | NR | NR    | NR  | NR    | NR        | NR  |
| REG                       | NR                              | NR  | NR  | NR   | NR   | 48  | NR   | NR  | NR   | NR | NR    | NR  | NR    | NR        | NR  |
| Nakashima et al [27]      |                                 |     |     |      |      |     |      |     |      |    |       |     |       |           |     |
| TFD/TPI                   | NR                              | NR  | NR  | NR   | NR   | NR  | NR   | NR  | NR   | NR | 76    | 72  | 74    | 11        | NR  |
| REG                       | NR                              | NR  | NR  | NR   | NR   | NR  | NR   | NR  | NR   | NR | 76    | 66  | 72    | 15        | NR  |
| Patel et al [28]          |                                 |     |     |      |      |     |      |     |      |    |       |     |       |           |     |
| TFD/TPI                   | NR                              | 6.3 | NR  | 31   | 28.6 | NR  | 20.6 | NR  | 13.5 | NR | NR    | NR  | NR    | NR        | NR  |
| REG                       | NR                              | 4.2 | NR  | 30.5 | 23.2 | NR  | 23.2 | NR  | 18.9 | NR | NR    | NR  | NR    | NR        | NR  |
| Vitale et al [29]         |                                 |     |     |      |      |     |      |     |      |    |       |     |       |           |     |
| TFD/TPI                   | NR                              | NR  | NR  | 55   | 37   | NR  | NR   | 8   | NR   | NR | 97    | 95  | NR    | NR        | NR  |
| REG                       | NR                              | NR  | NR  | 50   | 39   | NR  | NR   | 11  | NR   | NR | 98    | 92  | NR    | NR        | NR  |
| Hsieh et al [25]          |                                 |     |     |      |      |     |      |     |      |    |       |     |       |           |     |
| TFD/TPI                   | NR                              | NR  | NR  | 40   | 44   | NR  | 16   | NR  | NR   | NR | NR    | NR  | NR    | NR        | NR  |
| REG                       | NR                              | NR  | NR  | 33   | 53   | NR  | 14   | NR  | NR   | NR | NR    | NR  | NR    | NR        | NR  |
| <b>TFD/TPI vs placebo</b> |                                 |     |     |      |      |     |      |     |      |    |       |     |       |           |     |
| Yoshino et al [38]        |                                 |     |     |      |      |     |      |     |      |    |       |     |       |           |     |
| TFD/TPI                   | NR                              | NR  | NR  | 15   | NR   | 85  | NR   | NR  | NR   | NR | 100   | 100 | 78    | 63        | NR  |
| Placebo                   | NR                              | NR  | NR  | 23   | NR   | 77  | NR   | NR  | NR   | NR | 100   | 100 | 82    | 63        | NR  |
| Mayer et al [37]          |                                 |     |     |      |      |     |      |     |      |    |       |     |       |           |     |
| TFD/TPI                   | NR                              | NR  | NR  | 18   | 22   | NR  | NR   | 60  | NR   | NR | 100   | 100 | 100   | NR        | 17  |
| Placebo                   | NR                              | NR  | NR  | 17   | 20   | NR  | NR   | 63  | NR   | NR | 100   | 100 | >99   | NR        | 20  |
| Xu et al [30]             |                                 |     |     |      |      |     |      |     |      |    |       |     |       |           |     |
| TFD/TPI                   | 45                              | NR  | NR  | 23   | 27   | NR  | NR   | 50  | NR   | NR | NR    | NR  | 19    | NR        | NR  |
| Placebo                   | 51                              | NR  | NR  | 19   | 27   | NR  | NR   | 55  | NR   | NR | NR    | NR  | 20    | NR        | NR  |



| <b>REG vs placebo</b>    |                 |    |    |    |    |    |    |    |    |    |     |    |     |                 |    |    |
|--------------------------|-----------------|----|----|----|----|----|----|----|----|----|-----|----|-----|-----------------|----|----|
| Grothey et al [35]       |                 |    |    |    |    |    |    |    |    |    |     |    |     |                 |    |    |
| REG                      | NR              | NR | 27 | NR | 25 | NR | NR | 49 | NR | NR | NR  | NR | 100 | NR              | NR |    |
| Placebo                  | NR              | NR | 25 | NR | 28 | NR | NR | 47 | NR | NR | NR  | NR | 100 | NR              | NR |    |
| Li et al [36]            |                 |    |    |    |    |    |    |    |    |    |     |    |     |                 |    |    |
| REG                      | NR              | NR | NR | 23 | 24 | NR | NR | 54 | NR | NR | NR  | NR | 41  | NR              | NR |    |
| Placebo                  | NR              | NR | NR | 21 | 28 | NR | NR | 51 | NR | NR | NR  | NR | 37  | NR              | NR |    |
| Sanoff et al [4]         |                 |    |    |    |    |    |    |    |    |    |     |    |     |                 |    |    |
| REG                      | NR              | NR | NR | NR | NR | NR | NR | NR | NR | NR | NR  | NR | 63  | 9               | NR |    |
| Placebo                  | NR              | NR | NR | NR | NR | NR | NR | NR | NR | NR | NR  | NR | 67  | 7               | NR |    |
| Xu et al [31]            |                 |    |    |    |    |    |    |    |    |    |     |    |     |                 |    |    |
| REG                      | 63              | NR | NR | 25 | 18 | NR | NR | 57 | NR | NR | NR  | NR | 23  | 20 <sup>a</sup> | NR |    |
| Placebo                  | 65              | NR | NR | 18 | 25 | NR | NR | 57 | NR | NR | NR  | NR | 22  | 20 <sup>a</sup> | NR |    |
| <b>SIRT vs BSC</b>       |                 |    |    |    |    |    |    |    |    |    |     |    |     |                 |    |    |
| Hendlisz et al [33]      |                 |    |    |    |    |    |    |    |    |    |     |    |     |                 |    |    |
| SIRT                     | NR              | NR | NR | NR | NR | NR | NR | NR | NR | NR | NR  | 62 | 19  | NR              | NR | NR |
| BSC                      | NR              | NR | NR | NR | NR | NR | NR | NR | NR | NR | NR  | 87 | 9   | NR              | NR | NR |
| Bester et al [34]        |                 |    |    |    |    |    |    |    |    |    |     |    |     |                 |    |    |
| SIRT                     | 86 <sup>b</sup> | NR  | NR | NR  | NR              | NR | NR |
| BSC                      | 92              | NR  | NR | NR  | NR              | NR | NR |
| Seidensticker et al [32] |                 |    |    |    |    |    |    |    |    |    |     |    |     |                 |    |    |
| SIRT                     | NR              | 0  | NR | 28 | 31 | NR | 35 | NR | 3  | 3  | 90  | 90 | 52  | 52              | NR |    |
| BSC                      | NR              | 0  | NR | 24 | 38 | NR | 24 | NR | 10 | 3  | 100 | 90 | 48  | 66              | NR |    |

<sup>a</sup> Anti-VEGF and anti-EGFR; <sup>b</sup> Also included patients with other primary tumours.

Bevac, bevacizumab; BSC, best supportive care; EGFR, epidermal growth factor receptor; Irino, irinotecan; NR, not reported; Oxa, oxaliplatin; REG, regorafenib; SIRT, selective internal radiation therapy; TFD/TPI, trifluridine–tipiracil; VEGF, vascular endothelial growth factor.

**Table S12** Outcomes from the individual studies

| Outcome             | Hendлиз 2010 |          | Bester 2012 |          | Seidenstick er 2012 |          | Yoshino 2012  |          | Grothey 2013 |           |           | Li 2015  |               | Mayer 2015 |           | Moriwaki 2018 |           |          | Sanoff 2018   |           | Xu 2018   |          | Xu 2020  |               | Vitale 2021    |            | Nakashima 2020    |                   | Patel 2021   |          | Hsieh 2022 |  |
|---------------------|--------------|----------|-------------|----------|---------------------|----------|---------------|----------|--------------|-----------|-----------|----------|---------------|------------|-----------|---------------|-----------|----------|---------------|-----------|-----------|----------|----------|---------------|----------------|------------|-------------------|-------------------|--------------|----------|------------|--|
|                     | SIRT (21)    | BSC (22) | SIRT (224)  | BSC (29) | SIRT (29)           | BSC (29) | TFD/TPI (113) | BSC (57) | REG (505)    | BSC (253) | REG (136) | BSC (68) | TFD/TPI (533) | BSC (265)  | REG (223) | TFD/TPI (327) | REG (120) | BSC (61) | TFD/TPI (271) | BSC (135) | REG (112) | BSC (60) | REG (93) | TFD/TPI (100) | TFD/TPI (3777) | REG (1501) | TFD/TPI (126)     | REG (95)          | TFD/TPI (50) | REG (75) |            |  |
| Median OS (months)  | 10.0         | 7.3      | 12.0        | 6.3      | 8.3                 | 3.5      | 9.0           | 6.6      | 6.4          | 5.0       | 8.8       | 6.3      | 7.1           | 5.3        | 7.9       | 7.4           | 13.8      | 11.7     | 7.8           | 7.1       | 8.4       | 6.2      | 6.8      | 7.6           | 10.2           | 6.4        | 7.5               | 7.1               | 6.5          | 4.9      |            |  |
| Median PFS (months) | -            | -        | -           | -        | 5.5                 | 2.1      | 2.0           | 1.0      | 1.9          | 1.7       | 3.2       | 1.7      | 2.0           | 1.7        | 2.1       | 2.1           | 6.1       | 5.3      | 2             | 1.8       | 2.0       | 1.7      | 2.5      | 3.0           | -              | -          | -                 | -                 | 2            | 1.8      |            |  |
| RR (%)              | 9.5          | 0        | -           | -        | 41.4                | -        | 41            | 39       | 1.0          | 0.4       | 4         | 0        | 1.6           | 0.4        | 0         | 1             | 34        | 21       | 1.1           | 0         | 4         | 0        | 0        | 0             | -              | -          | 52.5 <sup>a</sup> | 34.2 <sup>a</sup> | 15           | 9        |            |  |

<sup>a</sup> rwORR, real-world overall response rate. BSC, best supportive care; OS, overall survival; PFS, progression free survival; RR, response rate; REG, regorafenib; SIRT, selective internal radiation therapy; TFD/TPI, trifluridine–tipiracil.

**Table S13** Grade 3 or higher relative adverse events reported by the individual studies (grey indicates SIRT results)

| Adverse event                        | Hendlisz 2010 |          | Bester 2012 |          | Seidensticker 2012 |          | Yoshino 2012  |          | Grothey 2013 |           | Li 2015   |          | Mayer 2015    |           | Moriwaki 2018 |               | Sanoff 2018 |          | Xu 2018       |           | Xu 2020   |          | Vitale 2021 |               |
|--------------------------------------|---------------|----------|-------------|----------|--------------------|----------|---------------|----------|--------------|-----------|-----------|----------|---------------|-----------|---------------|---------------|-------------|----------|---------------|-----------|-----------|----------|-------------|---------------|
|                                      | Treatment (n) |          |             |          |                    |          |               |          |              |           |           |          |               |           |               |               |             |          |               |           |           |          |             |               |
|                                      | SIRT (21)     | BSC (22) | SIRT (224)  | BSC (29) | SIRT (29)          | BSC (29) | TFD/TPI (113) | BSC (57) | REG (505)    | BSC (253) | REG (136) | BSC (68) | TFD/TPI (533) | BSC (265) | REG (223)     | TFD/TPI (327) | REG (120)   | BSC (61) | TFD/TPI (271) | BSC (135) | REG (112) | BSC (60) | REG (93)    | TFD/TPI (100) |
| Abdominal pain                       |               |          |             |          |                    |          |               | 0.2      | 0.0          | 0.7       | 0.0       | 2.4      | 3.8           |           |               |               |             | 0.4      | 0.0           | 0.9       | 0.0       |          |             |               |
| Acute kidney injury                  |               |          |             |          |                    |          |               |          |              | 0.0       | 1.5       |          |               |           |               |               |             |          |               | 0.0       | 1.7       |          |             |               |
| Alanine aminotransferase increase    |               |          |             |          |                    |          |               |          |              | 6.6       | 0.0       | 1.9      | 3.8           |           |               |               |             | 1.1      | 3.0           | 6.2       | 0.0       |          |             |               |
| Alkaline phosphatase increase        |               |          |             |          |                    |          |               |          |              | 0.0       | 1.5       | 8.0      | 10.7          |           |               |               |             | 4.1      | 3.7           | 0.9       | 1.7       |          |             |               |
| Allergy                              | 0.0           | 4.5      |             |          |                    |          |               |          |              |           |           |          |               |           |               |               |             |          |               |           |           |          |             |               |
| Anaemia                              |               |          |             |          |                    |          | 16.8          | 5.3      | 2.8          | 0.0       | 1.5       | 0.0      | 18.2          | 3.0       | 4.9           | 10.7          | 4.2         | 6.6      | 17.7          | 5.9       | 1.8       | 0.0      | 0.0         | 6.0           |
| Anorexia                             | 0.0           | 4.5      |             | 3.4      |                    |          | 4.4           | 3.5      | 3.2          | 2.8       | 0.7       | 0.0      |               |           | 4.5           | 5.5           | 5.0         | 0.0      |               |           | 0.9       | 0.0      |             |               |
| Aspartate aminotransferase increased |               |          |             |          |                    |          |               |          |              |           |           | 5.9      | 0.0           | 4.4       | 6.1           |               |             |          | 3.7           | 5.2       | 5.4       | 0.0      |             |               |
| Atrial fibrillation                  |               |          |             |          |                    |          |               |          |              |           |           | 0.0      | 1.5           |           |               |               |             |          |               |           | 0.0       | 1.7      |             |               |
| Bilirubin increased                  |               |          |             |          |                    |          |               |          |              |           |           | 6.6      | 1.5           | 8.6       | 11.8          |               |             |          | 7.0           | 7.4       | 4.5       | 1.7      | 1.1         | 0.0           |
| Bone marrow failure                  |               |          |             |          |                    |          |               |          |              |           |           |          |               |           |               |               |             |          | 1.1           | 0.0       |           |          |             |               |
| Cardiac ischemia                     |               |          |             |          |                    |          |               |          |              |           |           |          |               | 0.2       | 0.4           |               |             |          |               |           |           |          |             |               |
| Conduction disorder                  |               |          |             |          |                    |          |               |          |              |           | 0.0       | 1.5      |               |           |               |               |             |          |               |           |           |          |             |               |
| Decreased appetite                   |               |          |             |          |                    |          |               |          |              |           |           |          |               | 3.6       | 4.9           |               |             |          | 0.7           | 0.0       |           |          |             |               |
| Dehydration                          |               |          |             |          |                    |          |               |          |              |           |           |          |               |           |               |               | 5.8         | 3.3      |               |           |           |          |             |               |
| Diarrhoea                            |               |          |             |          |                    |          | 6.2           | 0.0      | 7.1          | 0.8       | 0.7       | 1.5      | 3.0           | 0.4       |               |               | 15.0        | 4.9      | 0.7           | 0.7       | 1.8       | 1.7      | 2.2         | 1.0           |
| Dyspnoea                             | 0.0           | 4.5      |             | 3.4      |                    |          |               |          | 0.2          | 0.0       |           |          |               |           |               |               |             |          | 0.0           | 0.7       |           |          |             |               |
| Peripheral oedema                    |               |          |             |          |                    |          |               |          |              |           |           |          |               |           |               |               |             |          |               | 0.7       |           |          |             |               |
| Fatigue                              | 0.0           | 22.7     |             | 17.2     |                    |          | 6.2           | 3.5      | 9.5          | 5.1       | 2.9       | 1.5      | 4.0           | 6.0       | 3.1           | 2.4           | 10.8        | 6.6      | 1.5           | 0.0       | 2.7       | 1.7      | 16.1        | 6.0           |
| Febrile neutropenia                  |               |          |             |          |                    |          | 4.4           | 0.0      |              |           |           |          | 3.8           | 0.0       | 0.0           | 2.8           | 9.2         | 3.3      |               |           |           |          | 0.0         | 5.0           |
| Fever                                |               |          |             |          |                    |          |               | 0.8      | 0.0          |           |           |          | 1.3           | 0.4       |               |               |             |          |               |           | 0.9       | 0.0      |             |               |
| Flank pain                           |               |          |             |          |                    |          |               |          |              |           | 0.7       | 0.0      |               |           |               |               |             |          |               |           |           |          |             |               |
| GGT increased                        |               |          |             |          |                    |          |               |          |              |           | 0.7       | 0.0      |               |           |               |               |             |          |               |           | 1.8       | 0.0      |             |               |
| Hand-foot skin reaction              | 4.8           | 0.0      |             |          |                    |          |               |          | 17           | 0.4       | 16        | 0        |               |           | 19.7          | 0.0           |             |          |               |           | 18.8      | 0.0      | 26.9        | 0.0           |
| Headache                             |               |          |             |          |                    |          |               |          | 0.6          | 0.0       |           |          |               |           |               |               |             |          |               |           |           |          |             |               |

|                                               |     |     |                   |      |     |      |     |     |      |     |      |      |      |      |      |     |     |     |     |      |
|-----------------------------------------------|-----|-----|-------------------|------|-----|------|-----|-----|------|-----|------|------|------|------|------|-----|-----|-----|-----|------|
| Heart failure                                 |     |     |                   |      | 0.0 | 1.5  |     |     |      |     |      |      |      | 0.0  | 1.7  |     |     |     |     |      |
| Hepatic function abnormal                     |     |     |                   |      |     |      |     |     |      |     |      | 0.4  | 0.0  |      |      |     |     |     |     |      |
| Hoarseness                                    |     |     |                   | 0.2  | 0.0 | 0.7  | 0.0 |     |      |     |      |      |      | 0.0  | 0.0  |     |     |     |     |      |
| Hypercalcemia                                 |     |     |                   |      |     |      |     |     |      |     |      | 0.0  | 0.7  |      |      |     |     |     |     |      |
| Hyperglycaemia                                |     |     |                   |      |     |      |     |     |      |     |      | 2.6  | 2.2  |      |      |     |     |     |     |      |
| Hyperkalaemia                                 |     |     |                   |      |     |      |     |     |      |     |      | 0.4  | 0.0  |      |      |     |     |     |     |      |
| Hypertension                                  |     |     |                   | 7.1  | 0.8 | 11.0 | 2.9 |     | 5.8  | 0.0 | 8.3  | 1.6  | 0.4  | 0.0  | 13.4 | 3.3 | 1.1 | 0.0 |     |      |
| Hypoalbuminemia                               |     |     |                   |      |     | 0.7  | 0.0 |     |      |     |      |      | 3.0  | 0.0  |      |     |     |     |     |      |
| Hypocalcaemia                                 |     |     |                   |      |     |      |     |     |      |     |      |      | 1.1  | 0.7  |      |     |     |     |     |      |
| Hypokalaemia                                  |     |     |                   |      |     | 0.7  | 0.0 |     |      |     | 5.8  | 1.6  | 0.7  | 0.7  | 0.9  | 0.0 |     |     |     |      |
| Hyponatremia                                  |     |     |                   |      |     |      |     |     |      |     |      |      | 4.4  | 4.4  |      |     |     |     |     |      |
| Hypophosphatemia                              |     |     |                   | 3.8  | 0.4 | 6.6  | 0.0 |     |      |     | 14.2 | 0.0  |      |      | 7.1  | 0.0 |     |     |     |      |
| Increase in creatinine level                  |     |     |                   |      |     |      |     | 0.9 | 0.8  |     |      |      | 1.1  | 0.0  |      |     |     |     |     |      |
| Laparotomy abnormality:<br>hyperbilirubinemia |     |     |                   | 2.0  | 0.8 |      |     |     |      |     |      |      |      |      |      |     |     |     |     |      |
| Leukopenia                                    |     |     |                   | 28.3 | 0.0 |      | 2.2 | 0.0 | 21.4 | 0.0 |      | 9.2  | 11.5 | 20.7 | 0.0  | 2.7 | 0.0 |     |     |      |
| Lipase increased                              |     |     |                   |      |     | 4.4  | 1.5 |     |      |     |      | 8.3  | 4.9  |      |      | 4.5 | 1.7 |     |     |      |
| Liver dysfunctions                            |     |     | 10.3 <sup>a</sup> |      |     |      |     |     | 12.1 | 0.3 |      |      |      | 0.0  | 0.7  |     |     |     |     |      |
| Lymphocytosis                                 |     |     |                   |      |     |      |     |     |      |     |      |      | 0.4  | 0.0  |      |     |     |     |     |      |
| Lymphopenia                                   |     |     |                   | 9.7  | 3.5 |      |     |     |      |     |      |      | 14.4 | 2.2  |      |     |     |     |     |      |
| Maculopapular rash                            |     |     |                   |      |     | 4.4  | 0.0 |     |      |     |      |      |      |      | 4.5  | 0.0 |     |     |     |      |
| Mucositis                                     |     |     |                   |      | 3.0 | 0.0  |     |     |      |     |      | 9.2  | 9.8  |      |      |     | 3.2 | 0.0 |     |      |
| Myalgia                                       |     |     |                   |      | 0.4 | 0.4  | 0.7 | 0.0 |      |     |      |      |      |      | 0.9  | 0.0 |     |     |     |      |
| Nausea                                        |     |     |                   | 4.4  | 0.0 | 0.4  | 0.0 |     | 1.9  | 1.1 |      |      |      | 0.7  | 0.0  |     | 0.0 | 1.0 |     |      |
| Neutropenia                                   |     |     |                   | 50.4 | 0.0 |      | 2.2 | 0.0 | 37.9 | 0.0 | 2.7  | 32.7 | 40.8 | 29.5 | 33.2 | 0.0 | 2.7 | 0.0 | 2.2 | 16.0 |
| Oesophageal varices haemorrhage               |     |     |                   |      |     | 0.7  | 0.0 |     |      |     |      |      |      |      |      |     |     |     |     |      |
| Pain                                          |     |     |                   |      |     |      |     |     |      |     |      |      |      |      |      |     | 1.1 | 0.0 |     |      |
| Palmar-plantar erythrodysesthesia             |     |     |                   |      |     |      |     |     |      |     |      | 5.0  | 1.6  |      |      |     |     |     |     |      |
| Palpitations                                  |     |     |                   |      |     |      |     |     |      |     |      |      |      | 0.4  | 0.0  |     |     |     |     |      |
| Pharyngitis                                   |     |     |                   |      |     | 0.7  | 0.0 |     |      |     |      |      |      |      |      |     |     |     |     |      |
| Pneumonia                                     |     |     |                   |      |     |      |     |     |      |     |      |      |      | 0.0  | 0.7  |     |     |     |     |      |
| Proteinuria                                   |     |     |                   |      | 1.4 | 0.4  | 1.5 | 1.5 |      |     |      |      |      |      | 1.8  | 1.7 |     |     |     |      |
| Pulmonary                                     | 0.0 | 4.5 | 3.4               |      |     |      |     |     |      |     |      |      |      |      |      |     |     |     |     |      |
| Rash                                          |     |     |                   |      | 5.7 | 0.0  |     |     |      |     |      |      |      |      |      |     | 2.2 | 0.0 |     |      |
| Rectal haemorrhage                            |     |     |                   |      |     |      |     |     |      |     |      |      |      |      |      |     |     |     |     |      |
